# Supplementary material for: Identification of a previously unreported co-crystal form of acetazolamide: a combination of multiple experimental and virtual screening methods
Source: Royal Society of Chemistry journal article supplement (doi:10.1039/d0cp02700f), 2020-01-01
Supplement: d0cp02700f1.pdf [file d0cp02700f1.pdf]

## Electronic Supplementary Information (ESI)

for

### Identification of previously unreported co-crystal form of acetazolamide: a combination of multiple experimental and virtual screening methods

*Alex N. Manin<sup>a</sup>, Ksenia V. Drozd<sup>a</sup>, Artem O. Surov<sup>a</sup>, Andrei V. Churakov<sup>b</sup>,  
Tatyana V. Volkova<sup>a</sup>, German L. Perlovich<sup>a,\*</sup>*

<sup>a</sup>G.A. Krestov Institute of Solution Chemistry RAS, 153045, Ivanovo, Russia

<sup>b</sup>Institute of General and Inorganic Chemistry RAS, Leninsky Prosp. 31, 119991, Moscow, Russia

\*Corresponding author: glp@isc-ras.ru

### Contents

|           |                                                                                                                                                                                                  | Page |
|-----------|--------------------------------------------------------------------------------------------------------------------------------------------------------------------------------------------------|------|
| S1        | Hansen solubility parameter                                                                                                                                                                      | 2    |
| Figure S1 | DSC heating for the selected (ACZ+PABA) mixtures at a heating rate of 10°C·min <sup>-1</sup> .                                                                                                   | 4    |
| Figure S2 | Time resolved XRPD patterns for the LAG reaction of ACZ and PABA (1:1) in the presence of (a) ACN and (b) H <sub>2</sub> O                                                                       | 5    |
| Figure S3 | Experimental XRPD patterns of the [ACZ+4-OHBA] co-crystal obtained by LAG with ACN and H <sub>2</sub> O after 30 min                                                                             | 6    |
| Figure S4 | Illustration of ACZ dimers connected by N <sub>sulfonamide</sub> -H···O <sub>acetamide</sub> hydrogen bonds (colored in blue) in the crystal structures of (a) [ACZ+PABA] (1:1) and (b) pure ACZ | 7    |
| Figure S5 | DSC/TG/DTG curves and mass-spectrum of ACZ                                                                                                                                                       | 8    |
| Table S1  | Group contribution parameters and associated molar volumes of the compounds according to the Hoftyzer–Van Krevelen method                                                                        | 9    |
| Table S2  | Molar volumes and HSPs for the selected compounds and solvents                                                                                                                                   | 11   |
| Table S3  | Sums of the intermolecular interaction energies (kJ·mol <sup>-1</sup> ) of the different types of molecules in [ACZ+4-OHBA] (1:1) and [ACZ+PABA] (1:1) calculated by the CrystalExplorer method  | 12   |
| Table S4  | Solution pH, eutectic concentrations of the ACZ and cofomers, calculated solubility of the co-crystals at 25.0°C                                                                                 | 13   |
| Table S5  | Coefficients of correlation equation (10) for the clusters including the considered compound as one from the components of the two-component crystal                                             | 14   |
| Table S6  | Experimental temperature dependences of acetazolamide (ACZ) and saccharin (Sacch) saturation vapor pressure                                                                                      | 15   |
| Table S7  | Thermodynamic parameters of sublimation of the compounds studied                                                                                                                                 | 16   |
| Table S8  | Results of estimating the formation thermodynamics of two-component acetazolamide crystals                                                                                                       | 17   |
| Table S9  | Results of molecular complementarity (MC) methods, multi-component score and ΔE values derived from the Hydrogen Bond Propensity and Molecular Electrostatic Potential calculations              | 18   |
| S2        | References                                                                                                                                                                                       | 19   |

## S1. Hansen solubility parameter

To predict the substance physicochemical properties, such as solubility, melting point, etc., it is possible to use solubility parameters.<sup>1</sup> Cohesion energy represents the sum of the forces (van der Waals interactions, covalent, hydrogen and ionic bonds) which hold the substance in its original state. Cohesion energy can also be defined as the energy that must be overcome in order to move a substance molecule from the liquid or solid phase to the gaseous one.<sup>1</sup> Cohesion energy per unit volume is called cohesion energy density (CED). CED can be used to calculate the solubility parameter ( $\delta$ ) as follows:<sup>2</sup>

$$\delta = (CED)^{0.5} = \left( \frac{\Delta E_v}{V_m} \right)^{0.5} \quad \text{S1}$$

where  $\Delta E_v$  is the evaporation energy,  $V_m$  is the molar volume. Parameter  $\delta$  is measured in the following units:  $(\text{J}/\text{cm}^3)^{0.5}$ ,  $\text{MPa}^{0.5}$  or  $(\text{cal}/\text{cm}^3)^{0.5}$ , where  $1(\text{cal}/\text{cm}^3)^{0.5}$  is equivalent to  $2.0421 \text{MPa}^{0.5}$  or  $(\text{J}/\text{cm}^3)^{0.5}$ .

Recently, Hansen's solubility parameters (HSPs) have been increasingly used to assess the solubility of drugs. In the Hansen approximation, the parameters of any organic substance consist of three components: solubility parameters characterized by the dispersion forces  $\delta_d$ , polarization interactions  $\delta_p$  and interactions resulting from the formation of hydrogen bonds  $\delta_h$ . The total solubility parameter  $\delta_t$ , or the three-dimensional solubility parameter, is determined as follows:

$$\delta_t = (\delta_d^2 + \delta_p^2 + \delta_h^2)^{0.5} \quad \text{S2}$$

Various theoretical and experimental methods based on solubility, calorimetry, sublimation, evaporation, reverse gas chromatography, and group contribution were used to estimate the HSPs of the substances.<sup>3</sup> Each component of the solubility parameter ( $\delta_d, \delta_p, \delta_h$ ) was calculated in the following way:<sup>4,5</sup>

$$\delta_d = \frac{\sum_i F_{d_i}}{\sum_i V_i} \quad \text{S3}$$

$$\delta_p = \frac{\left( \sum_i F_{p_i}^2 \right)^{0.5}}{\sum_i V_i} \quad \text{S4}$$

$$\delta_h = \left( \frac{\sum_i F_{h_i}}{\sum_i V_i} \right)^{0.5} \quad \text{S5}$$

where  $i$  is the structural group within the molecule,  $F_{d_i}$  is the group contribution to the dispersion forces,  $F_{p_i}$  is the group contribution to the polarization forces,  $F_{h_i}$  is the group contribution to the hydrogen bonding energy, and  $V_i$  is the group contribution to the molar volume.

The miscibility of compounds can be evaluated by various approaches, all of which are based on the general principle of “like dissolves like”. In other words, compounds with similar  $\delta$  values are more likely dissolve each other. Van Krevelen and Hoftyzer determined the miscibility of two compounds using  $\Delta\bar{\delta}$ , which is calculated as follows:

$$\Delta\bar{\delta} = \left[ (\delta_{d2} - \delta_{d1})^2 + (\delta_{p2} - \delta_{p1})^2 + (\delta_{h2} - \delta_{h1})^2 \right]^{0.5} \quad \text{S6}$$

Later, Krevlen et al. suggested that good solubility could be achieved if  $\Delta\bar{\delta} < 5 \text{ MPa}^{0.5}$ .<sup>5</sup> Besides this, Bagley et al. noticed that the effects of  $\delta_d$  and  $\delta_p$  are thermodynamically similar, while the effect of  $\delta_h$  differs in its nature from the others. In this regard, they introduced a volume dependent solubility parameter -  $\delta_v$ :<sup>6</sup>

$$\delta_v = (\delta_d^2 + \delta_p^2)^{0.5} \quad \text{S7}$$

Subsequently, the coefficient  $R_{a(v)}$  was used to determine the solubility of two compounds:

$$R_{a(v)} = \left[ 4(\delta_{v2} - \delta_{v1})^2 + (\delta_{h2} - \delta_{h1})^2 \right]^{0.5} \quad \text{S8}$$

A two-dimensional plot of the  $\delta_v$  dependence on  $\delta_h$  is called the Bagley diagram. This diagram has been used for various purposes, including the study of the solubility (miscibility) of components and predicting the duration of the intestinal absorption of different drugs.<sup>7,8</sup> In the study of the drug/polymer miscibility, it was found that these two components are well miscible if  $R_{a(v)} \leq 5.6 \text{ MPa}^{0.5}$ .<sup>7</sup>

Greenhalgh et al. used the difference in the total solubility parameter between the drug and the carrier ( $\Delta\delta_t$ ) as a tool for predicting miscibility:<sup>9</sup>

$$\Delta\delta_t = |\delta_{t2} - \delta_{t1}| \quad \text{S9}$$

where  $t1$  and  $t2$  are the carrier and the drug, respectively. In their work, studying many API/carrier systems as an example, the authors showed the general trend, indicating that systems with  $\Delta\delta_t < 7 \text{ MPa}^{0.5}$  are miscible, while systems with  $\Delta\delta_t > 10 \text{ MPa}^{0.5}$  are immiscible.<sup>9</sup>

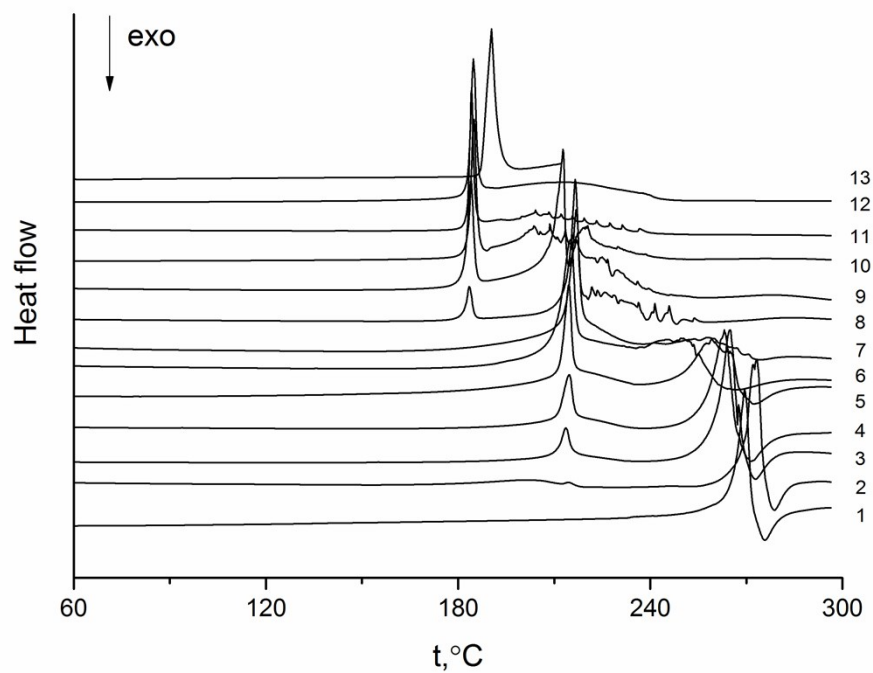

**Figure S1.** DSC heating for the selected (ACZ+PABA) mixtures at a heating rate of  $10^{\circ}\text{C}\cdot\text{min}^{-1}$ .  
**1.**  $X_{\text{PABA}}=0$ ; **2.**  $X_{\text{PABA}}=0.09$ ; **3.**  $X_{\text{FBP}}=0.11$ ; **4.**  $X_{\text{PABA}}=0.2$ ; **5.**  $X_{\text{PABA}}=0.33$ ; **6.**  $X_{\text{PABA}}=0.4$ ; **7.**  $X_{\text{PABA}}=0.5$ ; **8.**  $X_{\text{PABA}}=0.6$ ; **9.**  $X_{\text{PABA}}=0.67$ ; **10.**  $X_{\text{PABA}}=0.8$ ; **11.**  $X_{\text{PABA}}=0.89$ ; **12.**  $X_{\text{PABA}}=0.91$ ; **13.**  $X_{\text{PABA}}=1$

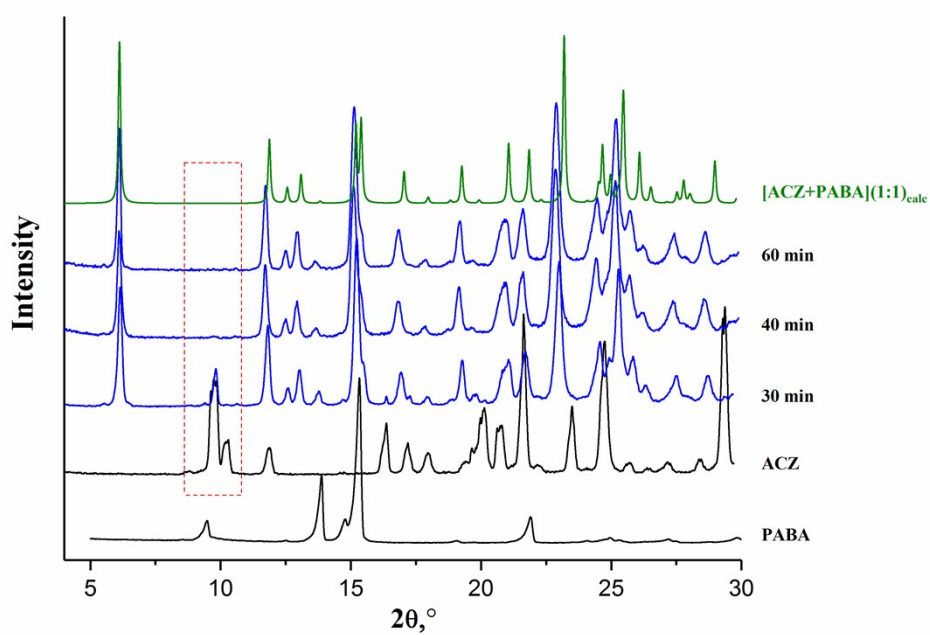

(a)

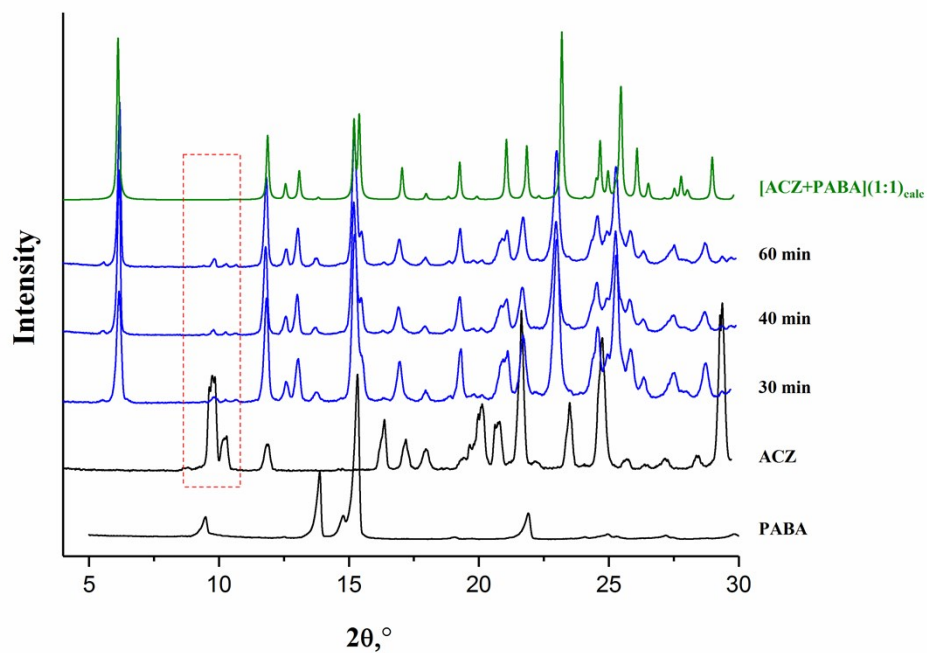

(b)

**Figure S2.** Time resolved XRPD patterns for the LAG reaction of ACZ and PABA (1:1) in the presence of (a) ACN and (b) H<sub>2</sub>O

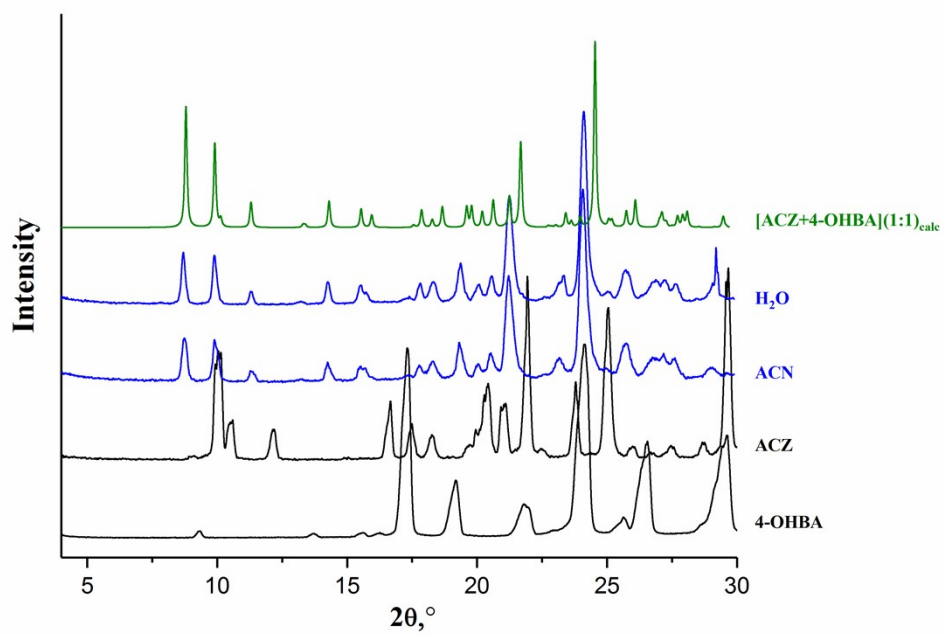

**Figure S3.** Experimental XRPD patterns of the [ACZ+4-OHBA] co-crystal obtained by LAG with ACN and H<sub>2</sub>O after 30 min

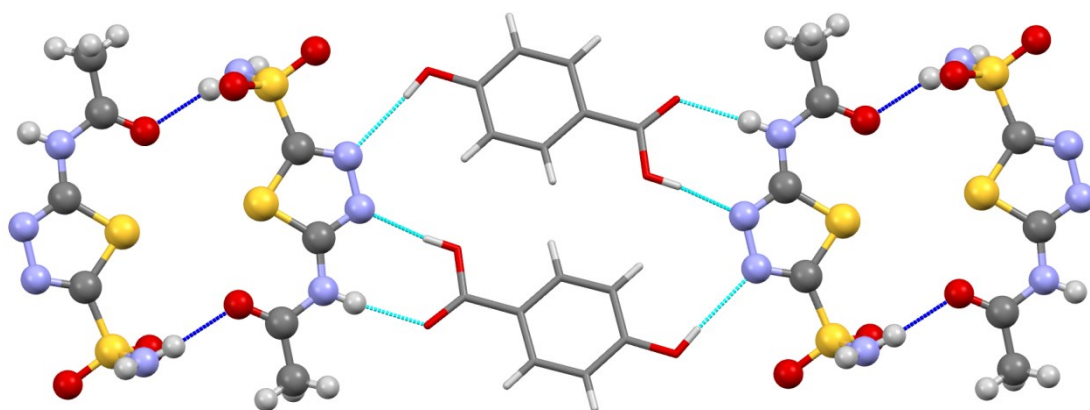

(a)

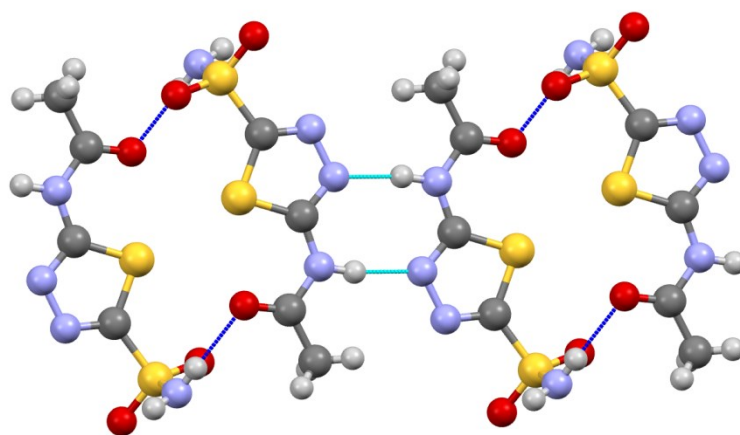

(b)

**Figure S4.** Illustration of ACZ dimers connected by  $N_{\text{sulfonamide}}\text{-H}\cdots O_{\text{acetamide}}$  hydrogen bonds (colored in blue) in the crystal structures of (a) [ACZ+PABA] (1:1) and (b) pure ACZ

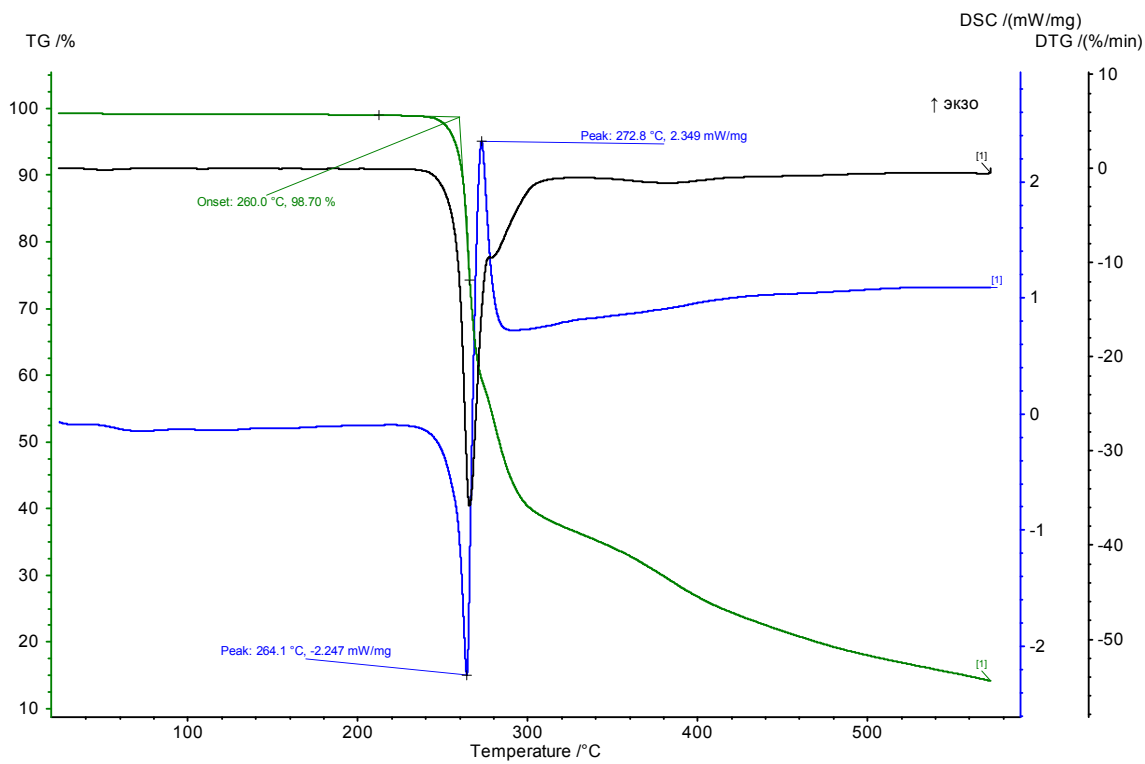

a

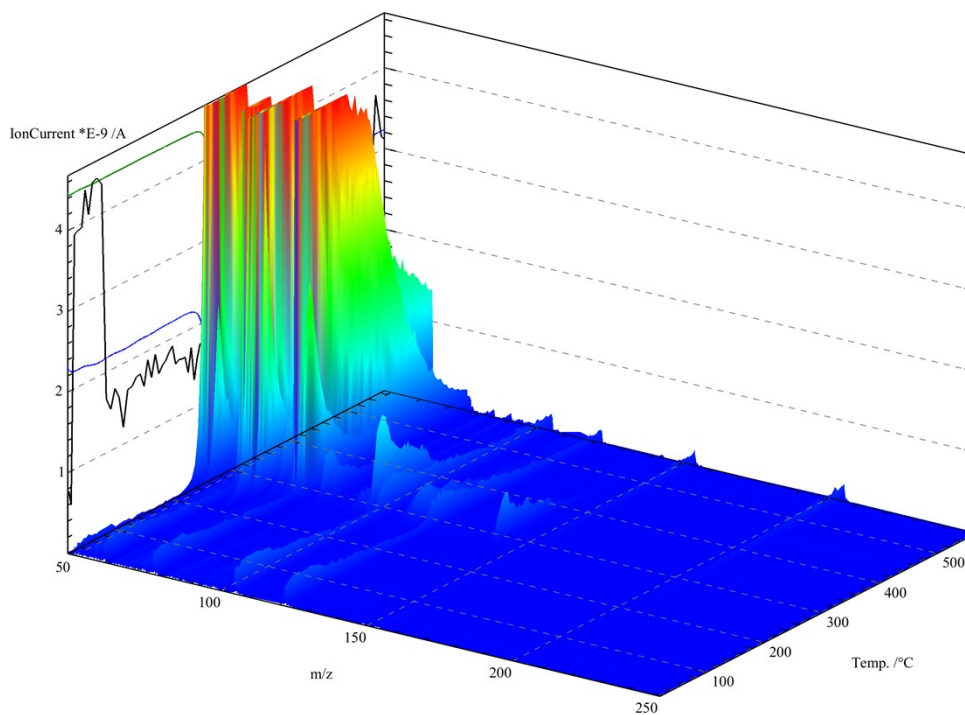

b

**Figure S5.** (a) DSC/TG/DTG curves of ACZ; (b) mass-spectrum of ACZ



**Table S1.** Group contribution parameters and associated molar volumes of the compounds according to the Hoftyzer–Van Krevelen method

| Compound                                                                                                                    | Structural group    | Quantity | $F_{d_i}$ ,<br>( $\text{J}\cdot\text{m}^3$ ) <sup>0.5</sup> ·mol <sup>-1</sup> | $F_{p_i}^2$ ,<br>( $\text{J}\cdot\text{m}^3$ ) <sup>0.5</sup> ·mol <sup>-1</sup> | $F_{h_i}$ ,<br>J·mol <sup>-1</sup> | <sup>a</sup> $V_i$ ,<br>cm <sup>3</sup> ·mol <sup>-1</sup> |
|-----------------------------------------------------------------------------------------------------------------------------|---------------------|----------|--------------------------------------------------------------------------------|----------------------------------------------------------------------------------|------------------------------------|------------------------------------------------------------|
| <b>Acetazolamide (ACZ)</b><br>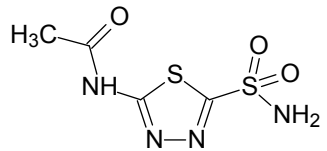             | -CH <sub>3</sub>    | 1        | 420                                                                            | 0                                                                                | 0                                  | 33.5                                                       |
|                                                                                                                             | =C<                 | 2        | 140                                                                            | 0                                                                                | 0                                  | -11.0                                                      |
|                                                                                                                             | -CO-                | 1        | 290                                                                            | 592900                                                                           | 2000                               | 10.8                                                       |
|                                                                                                                             | -NH-                | 1        | 160                                                                            | 44100                                                                            | 3100                               | 4.5                                                        |
|                                                                                                                             | -NH <sub>2</sub>    | 1        | 300                                                                            | 193600                                                                           | 8600                               | 19.2                                                       |
|                                                                                                                             | -N=                 | 2        | 40                                                                             | 2560000                                                                          | 10000                              | 10.0                                                       |
|                                                                                                                             | -S-                 | 1        | 440                                                                            | -                                                                                | -                                  | 12.0                                                       |
|                                                                                                                             | -SO <sub>2</sub> -  | 1        | 1129                                                                           | 1844164                                                                          | 11670                              | 51.0                                                       |
|                                                                                                                             | <b>Σ</b>            |          |                                                                                | <b>2919</b>                                                                      | <b>5234764</b>                     | <b>35370</b>                                               |
| <b>Salicylic acid (SA)</b><br>             | Phenylene (o, m, p) | 1        | 1270                                                                           | 12100                                                                            | 0                                  | 52.4                                                       |
|                                                                                                                             | -COOH               | 1        | 530                                                                            | 176400                                                                           | 10000                              | 28.5                                                       |
|                                                                                                                             | -OH                 | 1        | 210                                                                            | 250000                                                                           | 20000                              | 13.0                                                       |
|                                                                                                                             | <b>Σ</b>            |          | <b>2010</b>                                                                    | <b>438500</b>                                                                    | <b>30000</b>                       | <b>93.9</b>                                                |
| <b>4-Hydroxybenzoic acid (4-OHBA)</b><br> | Phenylene (o, m, p) | 1        | 1270                                                                           | 12100                                                                            | 0                                  | 52.4                                                       |
|                                                                                                                             | -COOH               | 1        | 530                                                                            | 176400                                                                           | 10000                              | 28.5                                                       |
|                                                                                                                             | -OH                 | 1        | 210                                                                            | 250000                                                                           | 20000                              | 13.0                                                       |
|                                                                                                                             | <b>Σ</b>            |          | <b>2010</b>                                                                    | <b>438500</b>                                                                    | <b>30000</b>                       | <b>93.9</b>                                                |
| <b>4-Aminobenzoic acid (PABA)</b><br>    | Phenylene (o, m, p) | 1        | 1270                                                                           | 12100                                                                            | 0                                  | 52.4                                                       |
|                                                                                                                             | -COOH               | 1        | 530                                                                            | 176400                                                                           | 10000                              | 28.5                                                       |
|                                                                                                                             | -NH <sub>2</sub>    | 1        | 300                                                                            | 193600                                                                           | 8600                               | 19.2                                                       |
|                                                                                                                             | <b>Σ</b>            |          | <b>2100</b>                                                                    | <b>382100</b>                                                                    | <b>18600</b>                       | <b>100.1</b>                                               |
| <b>Theophylline (Tph)</b>                                                                                                   | -CH <sub>3</sub>    | 2        | 840                                                                            | 0                                                                                | 0                                  | 67.0                                                       |

|                                                                                   |                          |      |             |                |              |              |
|-----------------------------------------------------------------------------------|--------------------------|------|-------------|----------------|--------------|--------------|
| 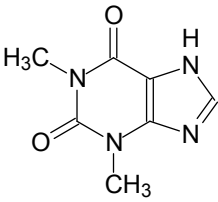 | =CH-                     | 1    | 200         | 0              | 0            | 13.5         |
|                                                                                   | =C<                      | 2    | 140         | 0              | 0            | -11.0        |
|                                                                                   | -CO                      | 2    | 580         | 2371600        | 4000         | 21.6         |
|                                                                                   | -NH-                     | 1    | 160         | 44100          | 3100         | 4.5          |
|                                                                                   | -N<                      | 2    | 40          | 2560000        | 10000        | -18.0        |
|                                                                                   | -N=                      | 1    | 20          | 640000         | 5000         | 5.0          |
|                                                                                   | <b>Σ</b>                 |      | <b>1980</b> | <b>5615700</b> | <b>22100</b> | <b>82.6</b>  |
| <b>Caffeine (Caf)</b>                                                             | -CH <sub>3</sub>         | 3    | 1260        | 0              | 0            | 100.5        |
|  | =CH-                     | 1    | 200         | 0              | 0            | 13.5         |
|                                                                                   | =C<                      | 2    | 140         | 0              | 0            | -11.0        |
|                                                                                   | -CO                      | 2    | 580         | 2371600        | 4000         | 21.6         |
|                                                                                   | -N<                      | 3    | 60          | 5760000        | 15000        | -27.0        |
|                                                                                   | -N=                      | 1    | 20          | 640000         | 5000         | 5.0          |
|                                                                                   | <b>Σ</b>                 |      | <b>1972</b> | <b>8771600</b> | <b>24000</b> | <b>102.6</b> |
|                                                                                   | <b>Saccharin (Sacch)</b> | =CH- | 4           | 800            | 0            | 0            |
|  | =C<                      | 2    | 140         | 0              | 0            | -11.0        |
|                                                                                   | -CO                      | 1    | 290         | 595900         | 2000         | 10.8         |
|                                                                                   | -NH-                     | 1    | 160         | 44100          | 3100         | 4.5          |
|                                                                                   | -SO <sub>2</sub> -       | 1    | 1129        | 1844164        | 11670        | 51.0         |
|                                                                                   | <b>Σ</b>                 |      | <b>2519</b> | <b>2481164</b> | <b>16770</b> | <b>109.3</b> |

<sup>a</sup> The molar volume is calculated according to [4]

**Table S2.** Molar volumes and HSPs for the selected compounds and solvents

|                       | $V_m$ ,<br>$\text{cm}^3 \cdot \text{mol}^{-1}$ | <sup>a</sup> $\delta_d$ , $\text{MPa}^{0.5}$ | <sup>b</sup> $\delta_p$ , $\text{MPa}^{0.5}$ | <sup>c</sup> $\delta_h$ , $\text{MPa}^{0.5}$ | <sup>d</sup> $\delta_t$ , $\text{MPa}^{0.5}$ | <sup>e</sup> $\delta_v$ , $\text{MPa}^{0.5}$ | <sup>f</sup> $\Delta\bar{\delta}$ , $\text{MPa}^{0.5}$ | <sup>g</sup> $\Delta\delta_t$ , $\text{MPa}^{0.5}$ | <sup>h</sup> $R_{a(v)}$ , $\text{MPa}^{0.5}$ |
|-----------------------|------------------------------------------------|----------------------------------------------|----------------------------------------------|----------------------------------------------|----------------------------------------------|----------------------------------------------|--------------------------------------------------------|----------------------------------------------------|----------------------------------------------|
| <b>ACZ</b>            | 130.0                                          | 22.5                                         | 17.6                                         | 16.5                                         | 33.0                                         | 28.5                                         | -                                                      | -                                                  | -                                            |
| <b>SA</b>             | 93.9                                           | 21.4                                         | 7.1                                          | 17.9                                         | 28.8                                         | 22.5                                         | 10.7                                                   | 4.2                                                | 12.3                                         |
| <b>4-OHBA</b>         | 93.9                                           | 21.4                                         | 7.1                                          | 17.9                                         | 28.8                                         | 22.5                                         | 10.7                                                   | 4.2                                                | 12.3                                         |
| <b>PABA</b>           | 100.1                                          | 21.0                                         | 6.2                                          | 13.6                                         | 25.8                                         | 21.9                                         | 11.9                                                   | 7.2                                                | 14.5                                         |
| <b>Tph</b>            | 82.6                                           | 24.0                                         | 28.7                                         | 16.4                                         | 40.8                                         | 37.4                                         | 11.2                                                   | 7.9                                                | 17.7                                         |
| <b>Caf</b>            | 102.6                                          | 19.2                                         | 28.9                                         | 15.3                                         | 37.9                                         | 34.7                                         | 11.8                                                   | 4.9                                                | 12.5                                         |
| <b>Sacch</b>          | 109.3                                          | 23.0                                         | 14.4                                         | 12.4                                         | 29.9                                         | 27.2                                         | 5.2                                                    | 3.1                                                | 8.6                                          |
| <i>ACN</i>            | 52.9                                           | 15.3                                         | 18.0                                         | 6.1                                          | 24.4                                         | 23.6                                         |                                                        |                                                    |                                              |
| <i>EtOAc</i>          | 98.6                                           | 15.8                                         | 5.3                                          | 7.2                                          | 18.2                                         | 16.7                                         |                                                        |                                                    |                                              |
| <i>THF</i>            | 81.9                                           | 16.8                                         | 5.7                                          | 8.0                                          | 19.5                                         | 17.7                                         |                                                        |                                                    |                                              |
| <i>AO</i>             | 73.8                                           | 15.5                                         | 10.4                                         | 7.0                                          | 19.9                                         | 18.7                                         |                                                        |                                                    |                                              |
| <i>EtOH</i>           | 58.6                                           | 15.8                                         | 8.8                                          | 19.4                                         | 26.5                                         | 18.1                                         |                                                        |                                                    |                                              |
| <i>MeOH</i>           | 40.6                                           | 14.7                                         | 12.3                                         | 22.3                                         | 29.4                                         | 19.2                                         |                                                        |                                                    |                                              |
| <i>H<sub>2</sub>O</i> | 18.0                                           | 15.5                                         | 16.0                                         | 42.3                                         | 47.8                                         | 22.3                                         |                                                        |                                                    |                                              |

$$^a \delta_d = \sum F_d / \sum V_i$$

$$^b \delta_p = (\sum F_p^2)^{0.5} / \sum V_i$$

$$^c \delta_h = (\sum F_h / \sum V_i)^{0.5}$$

$$^d \delta_t = (\delta_d^2 + \delta_p^2 + \delta_h^2)^{0.5}$$

$$^e \delta_v = (\delta_d^2 + \delta_p^2)^{0.5}$$

$$^f \Delta\bar{\delta} = \left[ (\delta_{d2} - \delta_{d1})^2 + (\delta_{p2} - \delta_{p1})^2 + (\delta_{h2} - \delta_{h1})^2 \right]^{0.5}$$

$$^g \Delta\delta_t = |\delta_{t2} - \delta_{t1}|$$

$$^h R_{a(v)} = \left[ 4(\delta_{v2} - \delta_{v1})^2 + (\delta_{h2} - \delta_{h1})^2 \right]^{0.5}$$

**Table S3.** Sums of the intermolecular interaction energies ( $\text{kJ}\cdot\text{mol}^{-1}$ ) of the different types of molecules in [ACZ+4-OHBA] (1:1) and [ACZ+PABA] (1:1) calculated by the CrystalExplorer method

|                    | <b>ACZ-ACZ</b>          | <b>ACZ-CF</b>            | <b>CF-CF</b>           | <b>E<sub>latt</sub></b> |
|--------------------|-------------------------|--------------------------|------------------------|-------------------------|
| [ACZ+4-OHBA] (1:1) | -99.7<br><b>(30.5%)</b> | -210.7<br><b>(64.5%)</b> | -16.3<br><b>(5.0%)</b> | -326.6                  |
| [ACZ+PABA] (1:1)   | -64.1<br><b>(20.3%)</b> | -244.5<br><b>(77.5%)</b> | -7.1<br><b>(2.2%)</b>  | -315.7                  |

**Table S4.** Solution pH, eutectic concentrations of the ACZ and cofomers, calculated solubility of the co-crystals at 25.0°C

|                       | Final pH | $[ACZ]_{eu}$ , mol·L <sup>-1</sup> | $[CF]_{eu}$ , mol·L <sup>-1</sup> | $S_{CC}$ , mol·L <sup>-1</sup> |
|-----------------------|----------|------------------------------------|-----------------------------------|--------------------------------|
| <i>Initial pH 2.0</i> |          |                                    |                                   |                                |
| [ACZ+PABA] (1:1)      | 2.9      | $(3.9 \pm 0.2) \cdot 10^{-3}$      | $(2.1 \pm 0.2) \cdot 10^{-2}$     | $(9.0 \pm 0.1) \cdot 10^{-3}$  |
| [ACZ+4-OHBA] (1:1)    | 2.3      | $(3.8 \pm 0.4) \cdot 10^{-3}$      | $(1.6 \pm 0.4) \cdot 10^{-2}$     | $(7.7 \pm 0.6) \cdot 10^{-3}$  |
| <i>Initial pH 7.4</i> |          |                                    |                                   |                                |
| [ACZ+PABA] (1:1)      | 5.1      | $(4.0 \pm 0.1) \cdot 10^{-3}$      | $(5.4 \pm 0.1) \cdot 10^{-2}$     | $(1.5 \pm 0.2) \cdot 10^{-2}$  |
| [ACZ+4-OHBA] (1:1)    | 5.0      | $(4.2 \pm 0.06) \cdot 10^{-3}$     | $(5.4 \pm 0.1) \cdot 10^{-2}$     | $(1.5 \pm 0.2) \cdot 10^{-2}$  |

**Table S5.** Coefficients of correlation equation (S10) for the clusters including the considered compound as one from the components of the two-component crystal

$$T_{fus}(CC)/^{\circ}C = A + B \cdot T_{fus}(API/CF)/^{\circ}C$$

S10

| N <sup>o</sup> | API                   | (API:CF) | A           | B             | R <sup>a</sup> | $\sigma^b$ | n <sup>c</sup> | $T_{fus}([API + ACZ])/^{\circ}C$ |
|----------------|-----------------------|----------|-------------|---------------|----------------|------------|----------------|----------------------------------|
| 1              | Salicylic Acid        | 1:1      | 51.9 ± 8.9  | 0.549 ± 0.045 | 0.9079         | 14.7       | 34             | 198.2                            |
| 2              | 4-hydroxybenzoic acid | 1:1      | 42.1 ± 10.6 | 0.74 ± 0.05   | 0.938          | 15.1       | 27             | 238.7                            |
| 3              | 4-aminobenzoic acid   | 1:1      | 52.7 ± 10.5 | 0.62 ± 0.05   | 0.935          | 14.4       | 21             | 218.7                            |
| 4              | Theophylline          | 1:1      | 79.4 ± 13.0 | 0.571 ± 0.075 | 0.8079         | 18.5       | 33             | 231.6                            |
| 5              | Caffeine              | 1:1      | 42.7 ± 9.0  | 0.673 ± 0.045 | 0.9512         | 16.0       | 26             | 222.1                            |
| 6              | Saccharine            | 1:1      | 94.1 ± 8.7  | 0.459 ± 0.047 | 0.8504         | 13.5       | 39             | 216.4                            |

<sup>a</sup> Pair correlation coefficient;

<sup>b</sup> Standard deviation;

<sup>c</sup> The number of points in the cluster

**Table S6.** Experimental temperature dependences of acetazolamide (ACZ)<sup>a</sup> and saccharin (Sacch)<sup>b</sup> saturation vapor pressure

| ACZ   |                      | Sacch |       |
|-------|----------------------|-------|-------|
| t, °C | P, Pa                | t, °C | P, Pa |
| 179.7 | $3.24 \cdot 10^{-2}$ | 122   | 0.807 |
| 180.9 | $3.62 \cdot 10^{-2}$ | 124   | 0.997 |
| 182.2 | $4.04 \cdot 10^{-2}$ | 125   | 1.046 |
| 183.3 | $4.64 \cdot 10^{-2}$ | 126   | 1.215 |
| 184.1 | $5.03 \cdot 10^{-2}$ | 127   | 1.284 |
| 185.0 | $5.45 \cdot 10^{-2}$ | 128   | 1.408 |
| 185.8 | $5.84 \cdot 10^{-2}$ | 130   | 1.766 |
| 186.7 | $6.46 \cdot 10^{-2}$ | 131   | 1.935 |
| 187.8 | $7.07 \cdot 10^{-2}$ | 134   | 2.504 |
| 189.1 | $7.89 \cdot 10^{-2}$ | 136   | 3.005 |
| 190.2 | $8.63 \cdot 10^{-2}$ | 138   | 3.750 |
| 191.1 | $9.73 \cdot 10^{-2}$ | 140   | 4.484 |
| 192.0 | $1.04 \cdot 10^{-1}$ | 141   | 4.717 |
| 193.1 | $1.20 \cdot 10^{-1}$ | 143   | 5.662 |
| 194.3 | $1.39 \cdot 10^{-1}$ | -     | -     |

<sup>a</sup>  $\ln(P[\text{Pa}]) = (42.1 \pm 0.6) - (20599 \pm 285)/T$ ;  $\sigma = 6.8 \cdot 10^{-3}$ ;  $r = 0.99733$ ;  $F = 5221$ ;  $n = 15$

<sup>a</sup>  $\ln(P[\text{Pa}]) = (38.7 \pm 0.3) - (15382 \pm 133)/T$ ;  $\sigma = 4.9 \cdot 10^{-3}$ ;  $r = 0.9996$ ;  $n = 14$

**Table S7.** Thermodynamic parameters of sublimation of the compounds studied

| Compound      | $\Delta H_{sub}^T$ ,<br>kJ·mol <sup>-1</sup> | $C_{p,cr}^{298}$ ,<br>J·mol <sup>-1</sup> ·K <sup>-1</sup> <sup>a</sup> | $\Delta G_{sub}^{298}$ , kJ·mol <sup>-1</sup> | $\Delta H_{sub}^{298}$ , kJ·mol <sup>-1</sup> | $\Delta S_{sub}^{298}$ ,<br>J·mol <sup>-1</sup> ·K <sup>-1</sup> | $T \cdot \Delta S_{sub}^{298}$ , kJ·mol <sup>-1</sup> |
|---------------|----------------------------------------------|-------------------------------------------------------------------------|-----------------------------------------------|-----------------------------------------------|------------------------------------------------------------------|-------------------------------------------------------|
| Acetazolamide | 171.3±2.5                                    | 250.1                                                                   | 95.5                                          | 177.5±2.6                                     | 275±12                                                           | 82.0                                                  |
| Saccharin     | 127.9±1.1                                    | 136.8                                                                   | 60.5                                          | 130.2±1.6                                     | 233±7                                                            | 69.7                                                  |

<sup>a</sup> $C_{p,cr}^{298}$  is calculated by Chickos' additive scheme [10], the calculation procedure error corresponds to a significant digit



**Table S8.** Results of estimating the formation thermodynamics of two-component acetazolamide crystals

| N | Coformer (CF) | Molar ratio<br>(ACZ:CF) | $T_{fus}(API)$<br>/ °C | $T_{fus}(CF)$<br>/ °C | $T_{fus}(CC)$ <sup>a</sup><br>/ °C | $\Delta G_{sub}^{0,298}(CF)$<br>/ kJ·mol <sup>-1</sup> | $\Delta H_{sub}^{0,298}(CF)$<br>/ kJ·mol <sup>-1</sup> | $\Delta G_f^{0,298}(CC)$<br>/ kJ·mol <sup>-1</sup> | $\Delta H_f^{0,298}(CC)$<br>/ kJ·mol <sup>-1</sup> |
|---|---------------|-------------------------|------------------------|-----------------------|------------------------------------|--------------------------------------------------------|--------------------------------------------------------|----------------------------------------------------|----------------------------------------------------|
| 1 | SA            | 1:1                     | 266.5                  | 158.1                 | 198.2                              | 38.5 <sup>b</sup>                                      | 96.6 <sup>b</sup>                                      | 7.4                                                | 10.5                                               |
| 2 | 4-OHBA        | 1:1                     | 266.5                  | 214.9                 | 238.7                              | 55.0 <sup>b</sup>                                      | 113.3 <sup>b</sup>                                     | 0.0                                                | -9.2                                               |
| 3 | PABA          | 1:1                     | 266.5                  | 187.3                 | 218.7                              | 52.5 <sup>c</sup>                                      | 118.0 <sup>c</sup>                                     | 3.2                                                | -3.8                                               |
| 4 | Theophylline  | 1:1                     | 266.5                  | 271.5                 | 231.6                              | 69.1 <sup>d</sup>                                      | 132.5 <sup>d</sup>                                     | -197.5 <sup>f</sup>                                | -336.6                                             |
| 5 | Caffeine      | 1:1                     | 266.5                  | 236.1                 | 222.1                              | 53.0 <sup>e</sup>                                      | 108.1 <sup>e</sup>                                     | 40.8                                               | 66.7                                               |
| 6 | Saccharine    | 1:1                     | 266.5                  | 227.6                 | 216.4                              | 60.5                                                   | 130.2                                                  | 27.6                                               | 37.3                                               |

<sup>a</sup> calculated by correlation equation (S10);

<sup>b</sup> from [11].

<sup>c</sup> from [12].

<sup>d</sup> from [13].

<sup>e</sup> from [14].

<sup>f</sup> The high value is obtained due to the close melting points of API and CF. In this case, the algorithm does not predict adequate values of the thermodynamic functions, however, it unambiguously indicates the direction of the reaction.

**Table S9.** Results of molecular complementarity (MC) methods, multi-component score and  $\Delta E$  values derived from the Hydrogen Bond Propensity and Molecular Electrostatic Potential calculations

|                 | MC   | Multi-component score | $\Delta E$ |
|-----------------|------|-----------------------|------------|
| ACZ+SA          | PASS | -0.16                 | -2.6       |
| ACZ+4OHBA       | PASS | -0.13                 | 12.4       |
| <b>ACZ+PABA</b> | PASS | 0.01                  | 6.1        |
| ACZ+Tph         | FAIL | -0.11                 | 17.1       |
| ACZ+Caf         | FAIL | 0.01                  | 4.7        |
| ACZ+Sacch       | FAIL | -0.10                 | -8.3       |

## S2. References

1. B.C. Hancock, P. York and R.C. Rowe, *Int. J. Pharm.*, 1997, **148**, 1.
2. J.H. Hildebrand and R.L. Scott, *The solubility of nonelectrolytes*, 1964, Dover Publications.
3. C.M. Hansen, *Hansen solubility parameters: a user's handbook*, second edition, 2007, CRC Press.
4. R.F. Fedors, *Polym. Eng. Sci.*, 1974, **14**, 147.
5. D.W. van Krevelen and K. te Nijenhuis, *Properties of polymers: their correlation with chemical structure; their numerical estimation and prediction from additive group contributions*, 2009, Elsevier Science.
6. E.B. Bagley, T.P. Nelson and J.M. Scigliano, *J. Paint. Technol.*, 1971, **43**, 35.
7. J. Albers, *Hot-melt extrusion with poorly soluble drugs*, 2008, Cuvillier.
8. J. Breitzkreutz, *Pharm. Res.*, 1998, **15**, 1370.
9. D.J. Greenhalgh, A.C. Williams, P. Timmins and P. York, *J. Pharm. Sci.*, 1999, **88**, 1182.
10. J.S. Chickos and W. Acree Jr., *J. Phys. Chem. Ref. Data*, 2003, **32**, 519.
11. G.L. Perlovich, T.V. Volkova and A. Bauer-Brandl, *J. Pharm. Sci.*, 2006, **95**, 2158.
12. T.V. Volkova, S.V. Blokhina, A.M. Ryzhakov, A.V. Sharapova, M.V. Ol'khovich and G.L. Perlovich, *J. of Therm. Anal. Calorim.*, 2016, **123**, 841.
13. A. Abdelaziz, D.H. Zaitsau, A. Buzyurove, A.A. Minakovf, S.P. Verevkin and C. Schick, *Thermochim. Acta*, 2019, **676**, 249.
14. V.N. Emel'yanenko and S.P. Verevkin, *J. Chem. Thermodyn.*, 2008, **40**, 1661.
